# Supplementary material
Source: publisher figshare collection journal article supplement (https://tandf.figshare.com/articles/dataset/_/1568804)
Supplement: Supplementary file 1 [file 2]

Archive with 4 entries (4 files):
- tase_a_1057068_sm5480.pdf
- tase_a_1057068_sm5453.pdf
- tase_a_1057068_sm5440.pdf
- tase_a_1057068_sm5417.pdf
