# Supplementary material
Source: publisher figshare collection journal article supplement (https://tandf.figshare.com/articles/dataset/_/1568804)
Supplement: Supplementary file 1 [file 2 › tase_a_1057068_sm5480.pdf]

**Supplementary Table 4 Time spent in diapause by Batch 4 offspring**

Date each larva placed in nut : 25 Jun. - 05 Jul. 2007

| Larva Number | Date Nut Re-opened and diapausing larva present | Date Nut Re-opened (see legend for symbols) | Adult Emergence Date        | Number of Months Spent in Diapause |
|--------------|-------------------------------------------------|---------------------------------------------|-----------------------------|------------------------------------|
| 1            |                                                 |                                             | ? Aug. - 27 Sep. 2007       | 3                                  |
| 2            |                                                 |                                             | ? Aug. - 27 Sep. 2007       | 3                                  |
| 3            |                                                 |                                             | ? Aug. - 27 Sep. 2007       | 3                                  |
| 4            |                                                 |                                             | ? Aug. - 27 Sep. 2007       | 3                                  |
| 5            | 01 Oct. 2007                                    |                                             | 21 Jan. - 22 Apr. 2008      | 9                                  |
| 6            |                                                 |                                             | 21 Jan. - 22 Apr. 2008      | 9                                  |
| 7            |                                                 |                                             | 22 Apr. - 13 May 2008       | 11                                 |
| 8            | 01 Oct. 2007                                    |                                             | 14 Nov. - 20 Dec. 2008      | 18                                 |
| 9            |                                                 |                                             | 14 Nov. - 20 Dec. 2008      | 18                                 |
| 10           |                                                 |                                             | 14 Nov. - 20 Dec. 2008      | 18                                 |
| 11           |                                                 |                                             | 14 Nov. - 20 Dec. 2008      | 18                                 |
| 12           |                                                 |                                             | 14 Nov. - 20 Dec. 2008      | 18                                 |
| 13           |                                                 |                                             | 14 Nov. - 20 Dec. 2008      | 18                                 |
| 14           |                                                 | 28 Dec. 2008 (DL)                           | NA                          | NA                                 |
| 15           |                                                 | 28 Dec. 2008 (LNP)                          | NA                          | NA                                 |
| 16           | 01 Oct. 2007                                    |                                             | 28 Dec. 2008 - 02 Jan. 2009 | 18                                 |
| 17           |                                                 |                                             | 27 Jan. - 21 Feb. 2009      | 20                                 |
| 18           | 28 Dec. 2008                                    |                                             | 21 Feb. - 18 Mar. 2009      | 21                                 |
| 19           |                                                 |                                             | 18 Mar. - 10 Jun. 2009      | 23                                 |
| 20           | 01 Oct. 2007                                    |                                             | 18 Mar. - 10 Jun. 2009      | 23                                 |
| 21           |                                                 |                                             | 10 Jun. - 04 Jul. 2009      | 24                                 |
| 22           |                                                 |                                             | 10 Jun. - 04 Jul. 2009      | 24                                 |
| 23           | 01 Oct. 2007                                    |                                             | 10 Jun. - 04 Jul. 2009      | 24                                 |
| 24           | 01 Oct. 2007                                    |                                             | 10 Jun. - 04 Jul. 2009      | 24                                 |
| 25           |                                                 |                                             | 10 Jun. - 04 Jul. 2009      | 24                                 |
| 26           |                                                 |                                             | 10 Jun. - 04 Jul. 2009      | 24                                 |
| 27           | 02 Jan. 2009                                    |                                             | 04 - 21 Jul. 2009           | 25                                 |
| 28           |                                                 |                                             | 28 Jul. - 03 Aug. 2009      | 26                                 |
| 29           | 28 Dec. 2008                                    |                                             | 23 Aug. - 08 Sep. 2009      | 27                                 |
| 30           | 02 Jan. 2009                                    |                                             | 12 - 25 Nov. 2009           | 29                                 |
| 31           | 27 Sep. 2009                                    |                                             | 12 - 25 Nov. 2009           | 29                                 |
| 32           | 28 Dec. 2008                                    |                                             | 25 Nov. - 08 Dec. 2009      | 30                                 |
| 33           | 27 Sep. 2009                                    |                                             | 14 - 29 Dec. 2009           | 30                                 |
| 34           | 28 Dec. 2008                                    |                                             | 29 Dec. 2009 - 05 Jan. 2010 | 31                                 |
| 35           | 01 Oct. 2007                                    |                                             | 21 - 28 Jan. 2010           | 31                                 |
| 36           | 27 Sep. 2009                                    |                                             | 26 Feb. - 15 May 2010       | 34                                 |
| 37           | 01 Oct. 2007                                    |                                             | 26 Feb. - 15 May 2010       | 34                                 |
| 38           | 28 Dec. 2008                                    |                                             | 26 Feb. - 15 May 2010       | 34                                 |
| 39           | 28 Dec. 2008                                    |                                             | 26 Feb. - 15 May 2010       | 34                                 |
| 40           | 28 Dec. 2008                                    |                                             | 26 Feb. - 15 May 2010       | 34                                 |
| 41           | 28 Dec. 2008                                    |                                             | 26 Feb. - 15 May 2010       | 34                                 |
| 42           | 28 Dec. 2008                                    |                                             | 15 - 27 May 2010            | 35                                 |
| 43           | 02 Jan. 2009                                    |                                             | 15 - 27 May 2010            | 35                                 |
| 44           | 27 Sep. 2009                                    |                                             | 27 May - 01 July 2010       | 36                                 |
| 45           | 27 Sep. 2009                                    |                                             | 27 May - 01 July 2010       | 36                                 |
| 46           | 01 Oct. 2007                                    |                                             | 27 May - 01 July 2010       | 36                                 |

|    |              |                   |                        |    |
|----|--------------|-------------------|------------------------|----|
| 47 | 02 Jan. 2009 |                   | 27 May - 01 July 2010  | 36 |
| 48 | 02 Jan. 2009 |                   | 01 Jul. - 09 Aug. 2010 | 37 |
| 49 | 01 Oct. 2007 | 12 Oct. 2010 (DA) | NA                     | NA |
| 50 | 02 Jan. 2009 | 12 Oct. 2010 (DA) | NA                     | NA |
| 51 | 28 Dec. 2008 | 05 Feb. 2013 (DA) | NA                     | NA |
| 52 | 27 Sep. 2009 | 05 Feb. 2013 (DA) | NA                     | NA |
| 53 |              | 05 Feb. 2013 (DL) | NA                     | NA |

### Legend for Supplementary Tables 1-4

Each larva was placed inside the nut on or within three days at most of the day on which it hatched. These nuts artificially infested with larvae were kept in plastic tubs that were examined periodically to note the presence of any adult beetles. These were removed together with the nuts with holes from which they had emerged. For Batches 1-3 (Supplementary Tables 1-3) month of placement was taken to be June 2006 and for Batch 4 (Supplementary Table 4) June 2007 for the purpose of computing the numbers in the column headed “Number of Months Spent in Diapause”. When an adult emerged from the nut five months or less following the month of placement it was considered not to have undergone diapause as a mature larva in spite of being included in this column. As indicated many nuts were re-opened to verify that the larva placed in each had developed to maturity and gone into diapause. Note that Supplementary Table 4 is organised differently from Supplementary Tables 1-3; instead of numbering each individual as it was placed in the nut as a larva, each has been numbered according to the chronological order in which it emerged as an adult.

DA – dead dried adult trapped inside endocarp; DL – dead dried mature larva or pupa inside endocarp; LA – live adult inside endocarp; LP – live pupa inside endocarp; LNP – recently hatched larva never succeeded in penetrating the endosperm or died shortly after penetration without consuming any observable amount of endosperm; NA – not applicable.
